# Supplementary material
Source: MDPI journal article supplement (https://www.mdpi.com/2073-4395/10/11/1708)
Supplement: s1 [file s1]

## Supplementary Materials

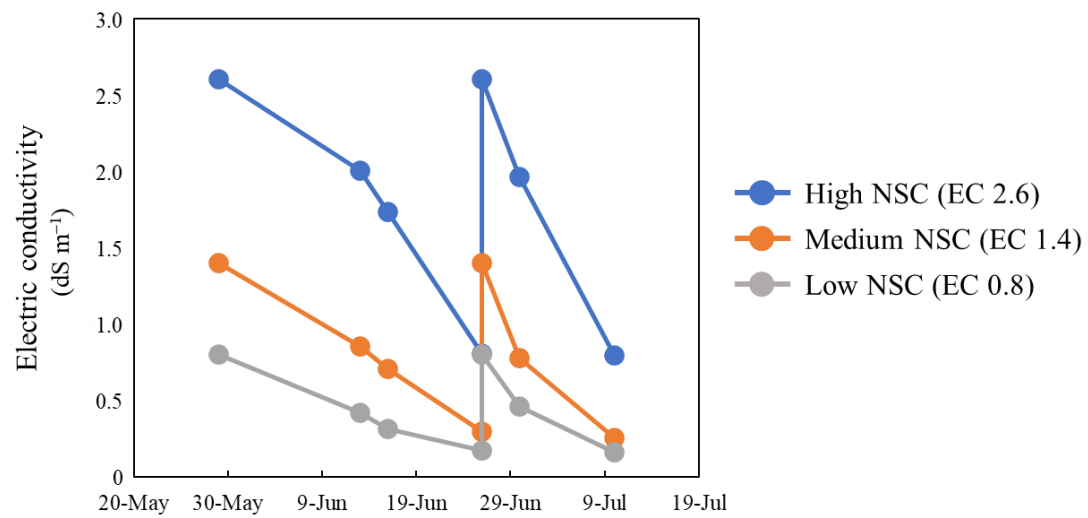

**Figure S1.** Time-course changes of nutrient solution EC in experiment 1. The nutrient solution was renewed on June 26. EC was measured two containers of each experimental plot. EC: electrical conductivity; NSC: nutrient solution concentration
